# Supplementary material for: Pathogenicity of Serratia marcescens Strains in Honey Bees
Source: PubMed Central journal article supplement (PMC6178626; doi:10.1128/mbio.01649-18), 2018-10-09

## Hemolymph Injections Hive 2

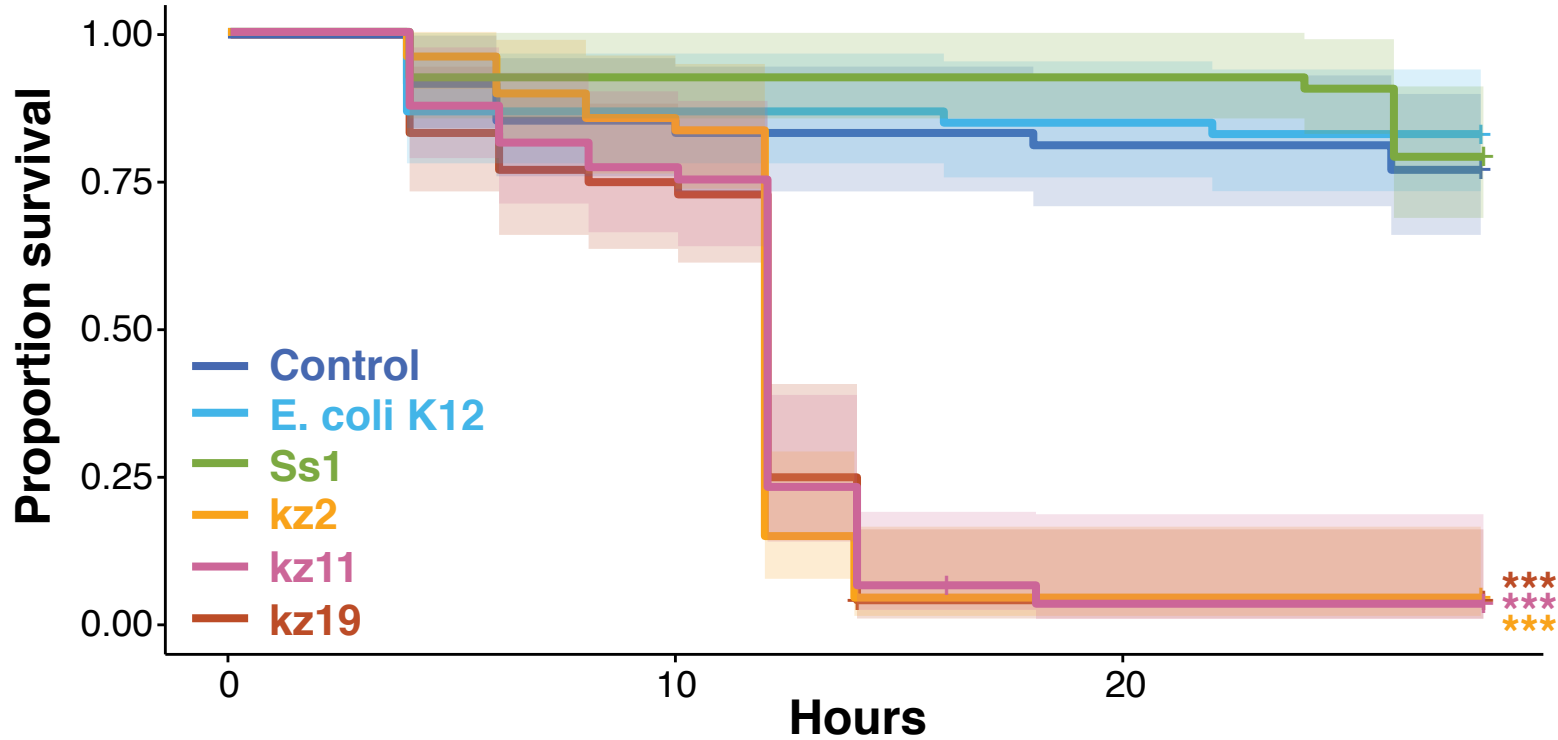

## Hemolymph Injections db11

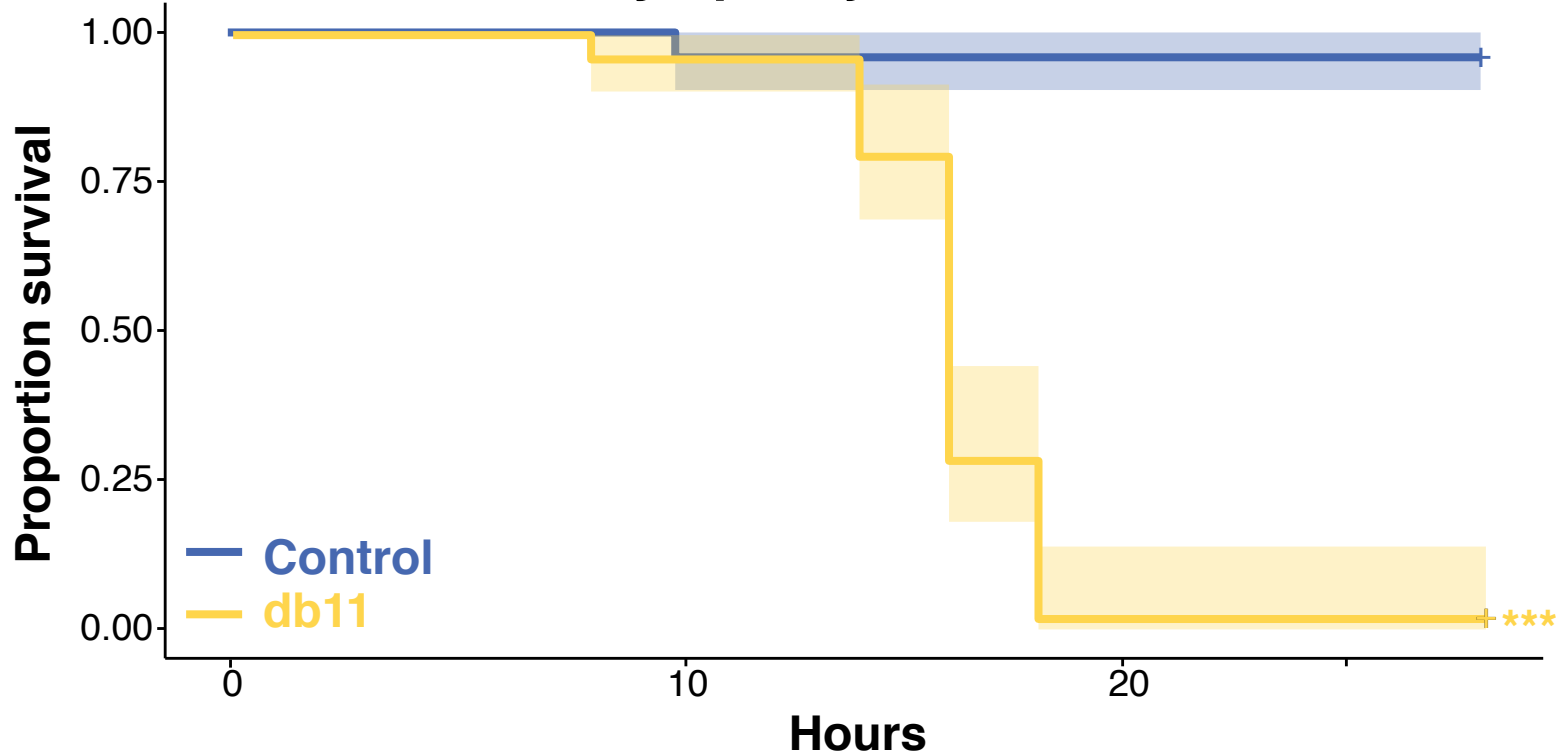

Supplement: mbo005184101sf3.pdf [file mbo005184101sf3.pdf]
