# Supplementary material for: Pathogenicity of Serratia marcescens Strains in Honey Bees
Source: PubMed Central journal article supplement (PMC6178626; doi:10.1128/mbio.01649-18), 2018-10-09

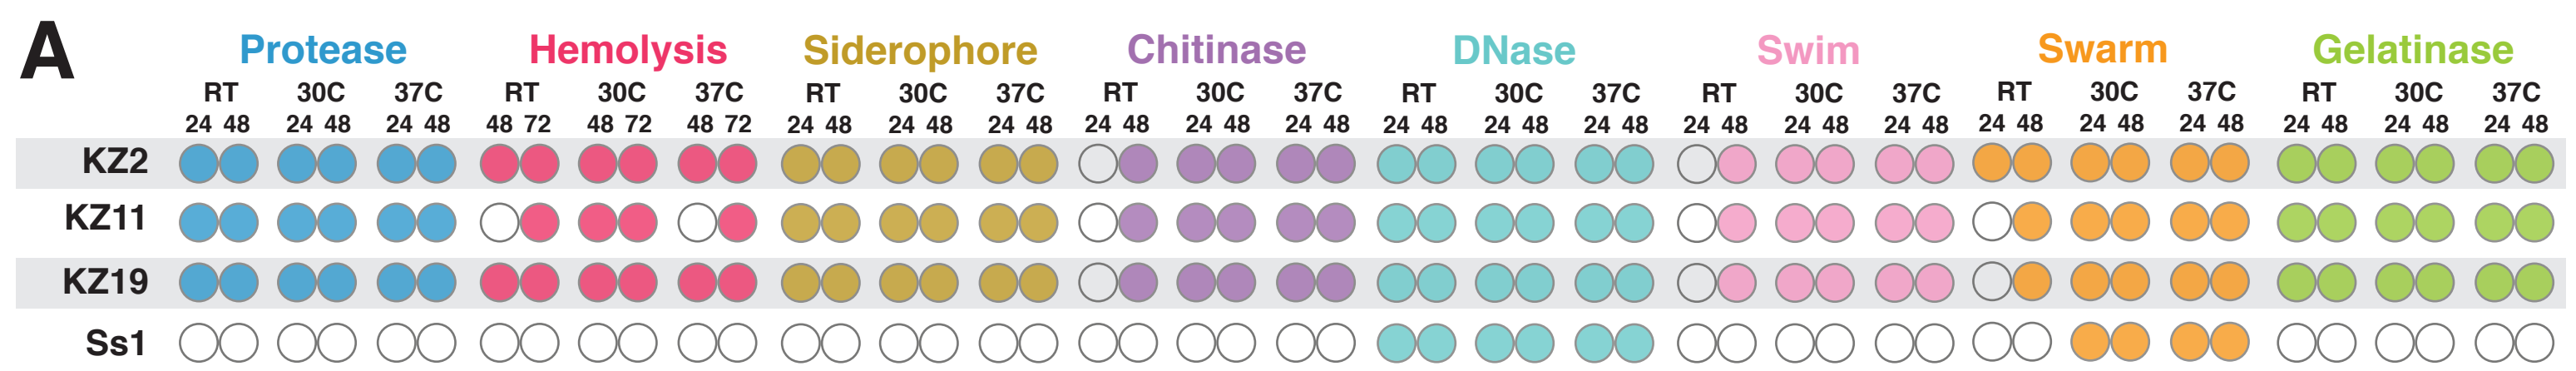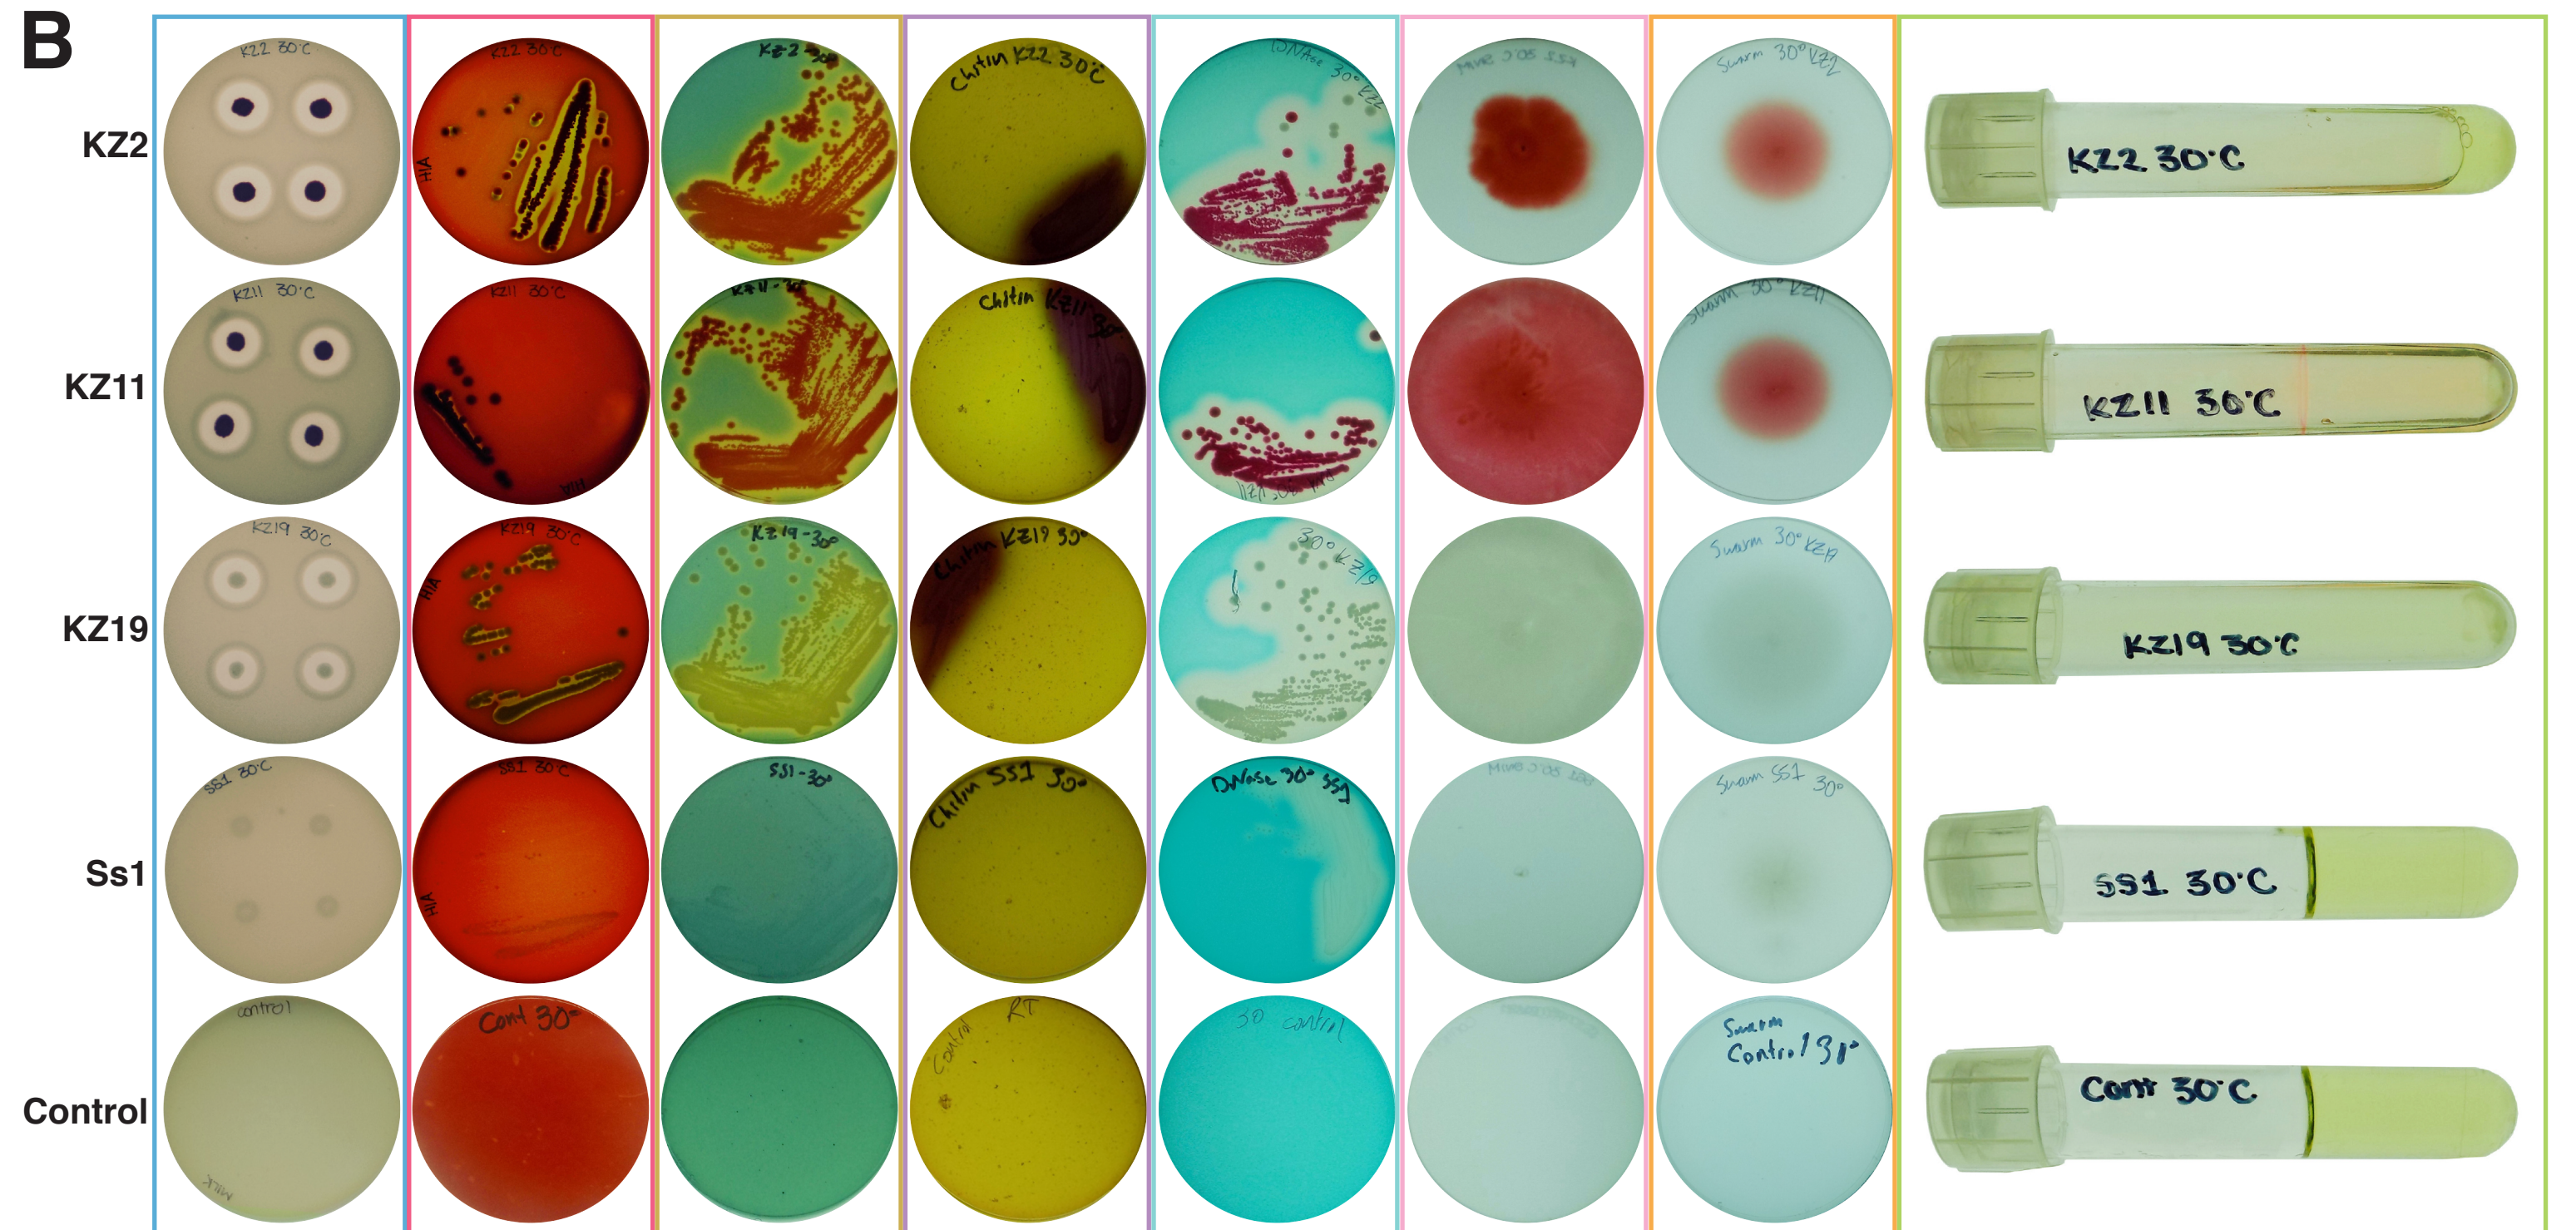

Supplement: mbo005184101sf5.pdf [file mbo005184101sf5.pdf]
