# Supplementary material for: Pathogenicity of Serratia marcescens Strains in Honey Bees
Source: PubMed Central journal article supplement (PMC6178626; doi:10.1128/mbio.01649-18), 2018-10-09
Supplement: mbo005184101sf6.pdf [file mbo005184101sf6.pdf]

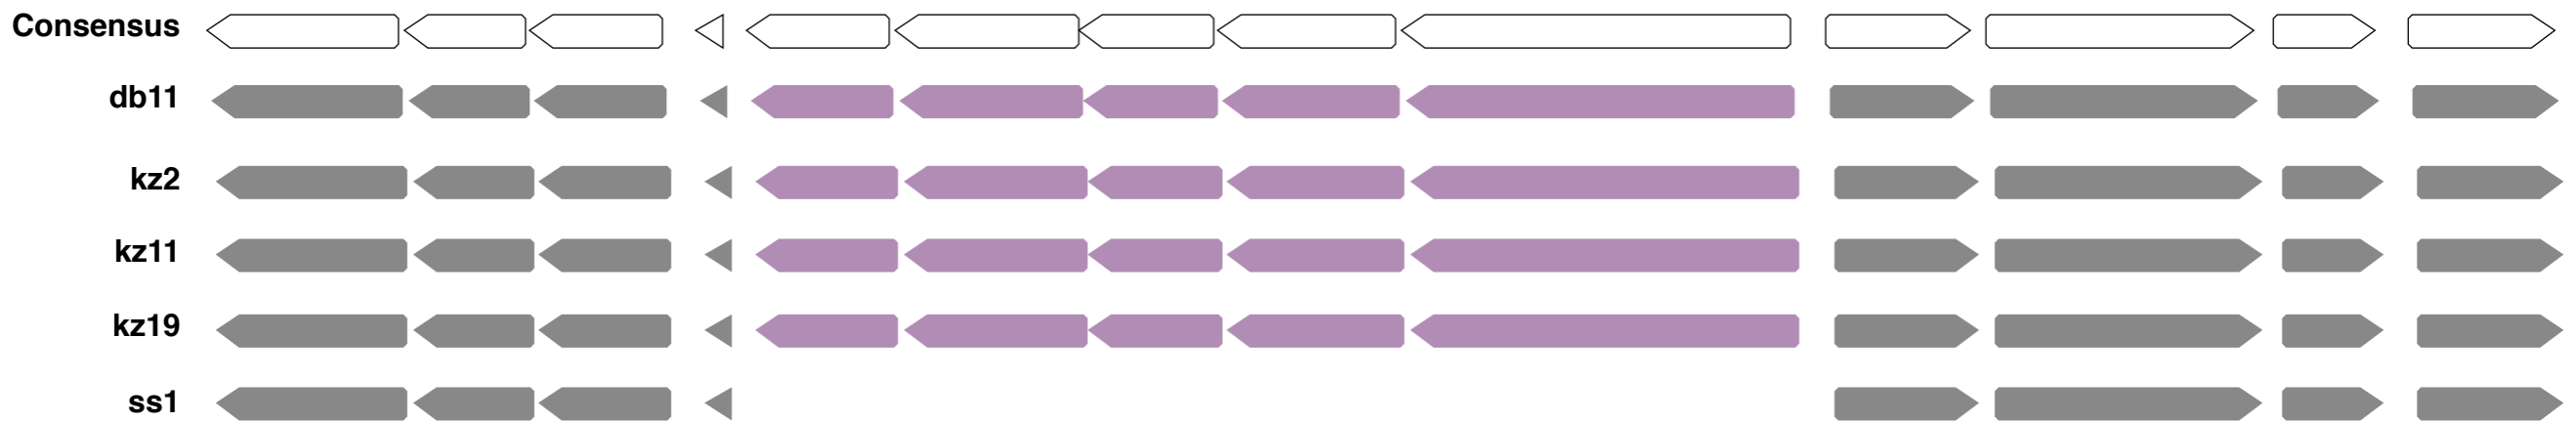

1. WP\_025301910 molybdenum ABC transporter ATP-binding protein ModC
2. WP\_019454005 molybdate ABC transporter permease subunit ModB
3. WP\_025301909 molybdate ABC transporter substrate-binding protei
4. WP\_004939813 multidrug efflux pump-associated protein, AcrZ family
- 5. WP\_025301908 ABC transporter ATP-binding protein**
- 6. WP\_025301907 iron ABC transporter permease**

- 7. WP\_025301906 class I SAM-dependent methyltransferase**
- 8. WP\_025301905 putative iron transport protein**
- 9. WP\_025301904 TonB-dependent receptor**
10. WP\_025301903 molybdenum-dependent transcriptional regulator
11. WP\_025301902 molybdate ABC transporter ATP-binding protein ModF
12. WP\_025301901 cysteine hydrolase
13. WP\_025301900 CPBP family intramembrane metalloprotease

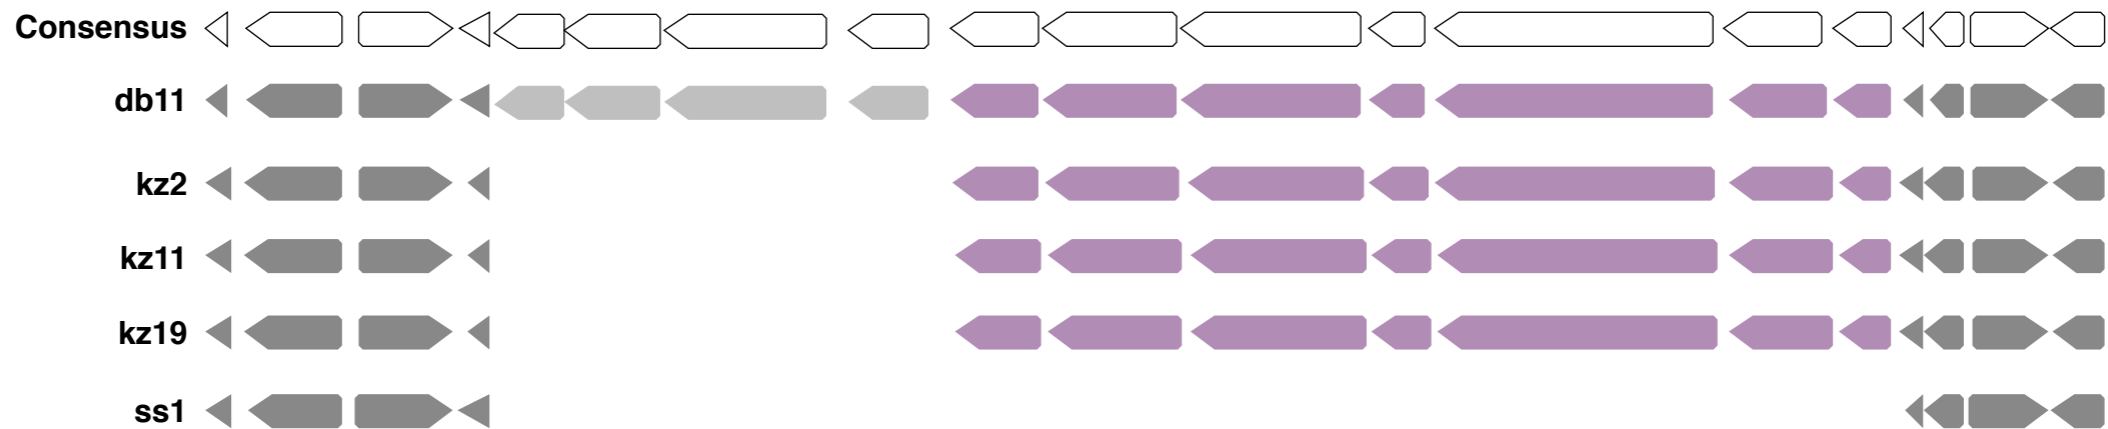

1. WP\_025301735 type II toxin-antitoxin system prevent-host-death family antitoxin
2. WP\_025301734 fructokinase
3. WP\_004940461 recombination-associated protein RdgC
4. WP\_004940463 pyrimidine/purine nucleoside phosphorylase
5. WP\_025301733 hypothetical protein
6. WP\_025301732 DUF1177 domain-containing protein
7. WP\_025301731 membrane protein
8. WP\_025301730 lclR family transcriptional regulator

- 9. WP\_025301729 energy transducer TonB**
- 10. WP\_025301728 HlyD family type I secretion periplasmic adaptor subunit**
- 11. WP\_025301727 type I secretion system permease/ATPase**
- 12. WP\_025301726 hemophore HasA**
- 13. WP\_025301725 TonB-dependent heme receptor**
- 14. WP\_025301724 iron dicitrate transport regulator FecR**
- 15. WP\_025301723 RNA polymerase sigma factor**
16. WP\_004940491 hypothetical protein
17. WP\_025301722 nuclear transport factor 2 family protein
18. WP\_025301721 AraC family transcriptional regulator
19. WP\_025301720 shikimate kinase AroL
