# Supplementary material for: Pathogenicity of Serratia marcescens Strains in Honey Bees
Source: PubMed Central journal article supplement (PMC6178626; doi:10.1128/mbio.01649-18), 2018-10-09

Region 4

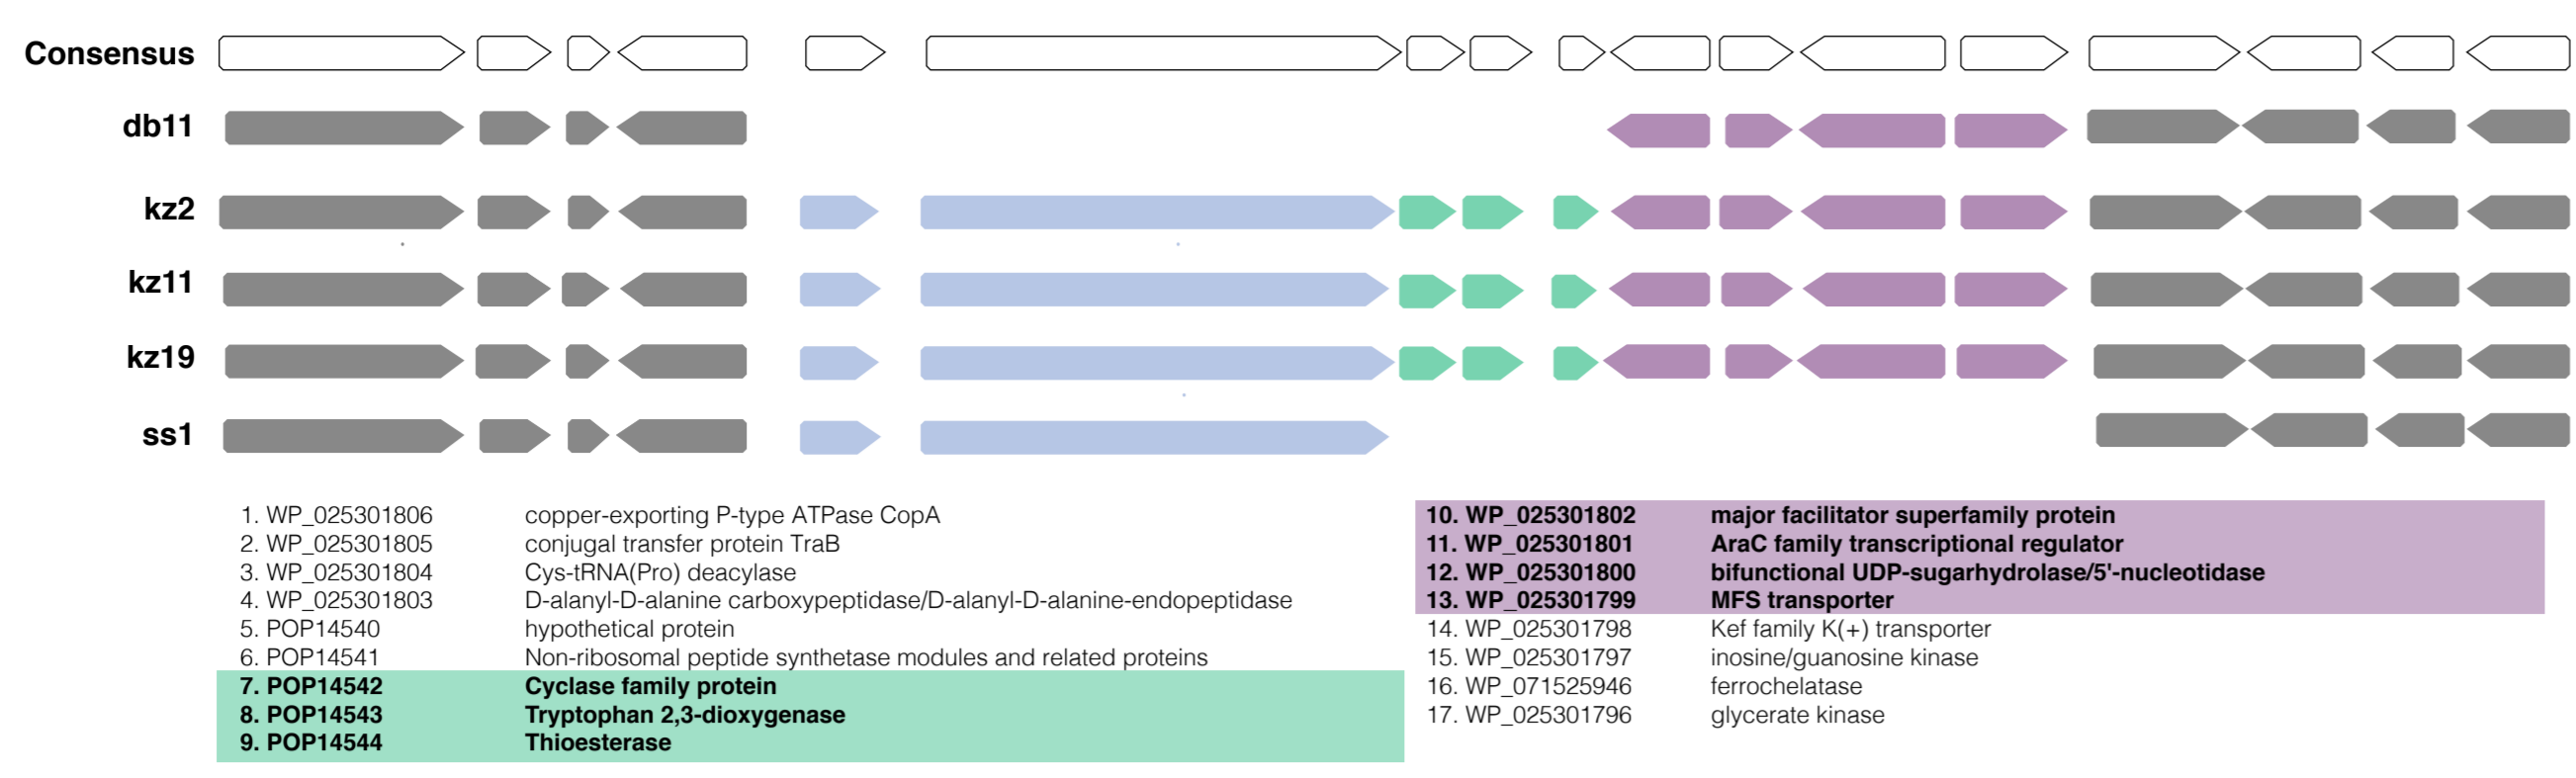

Region 10

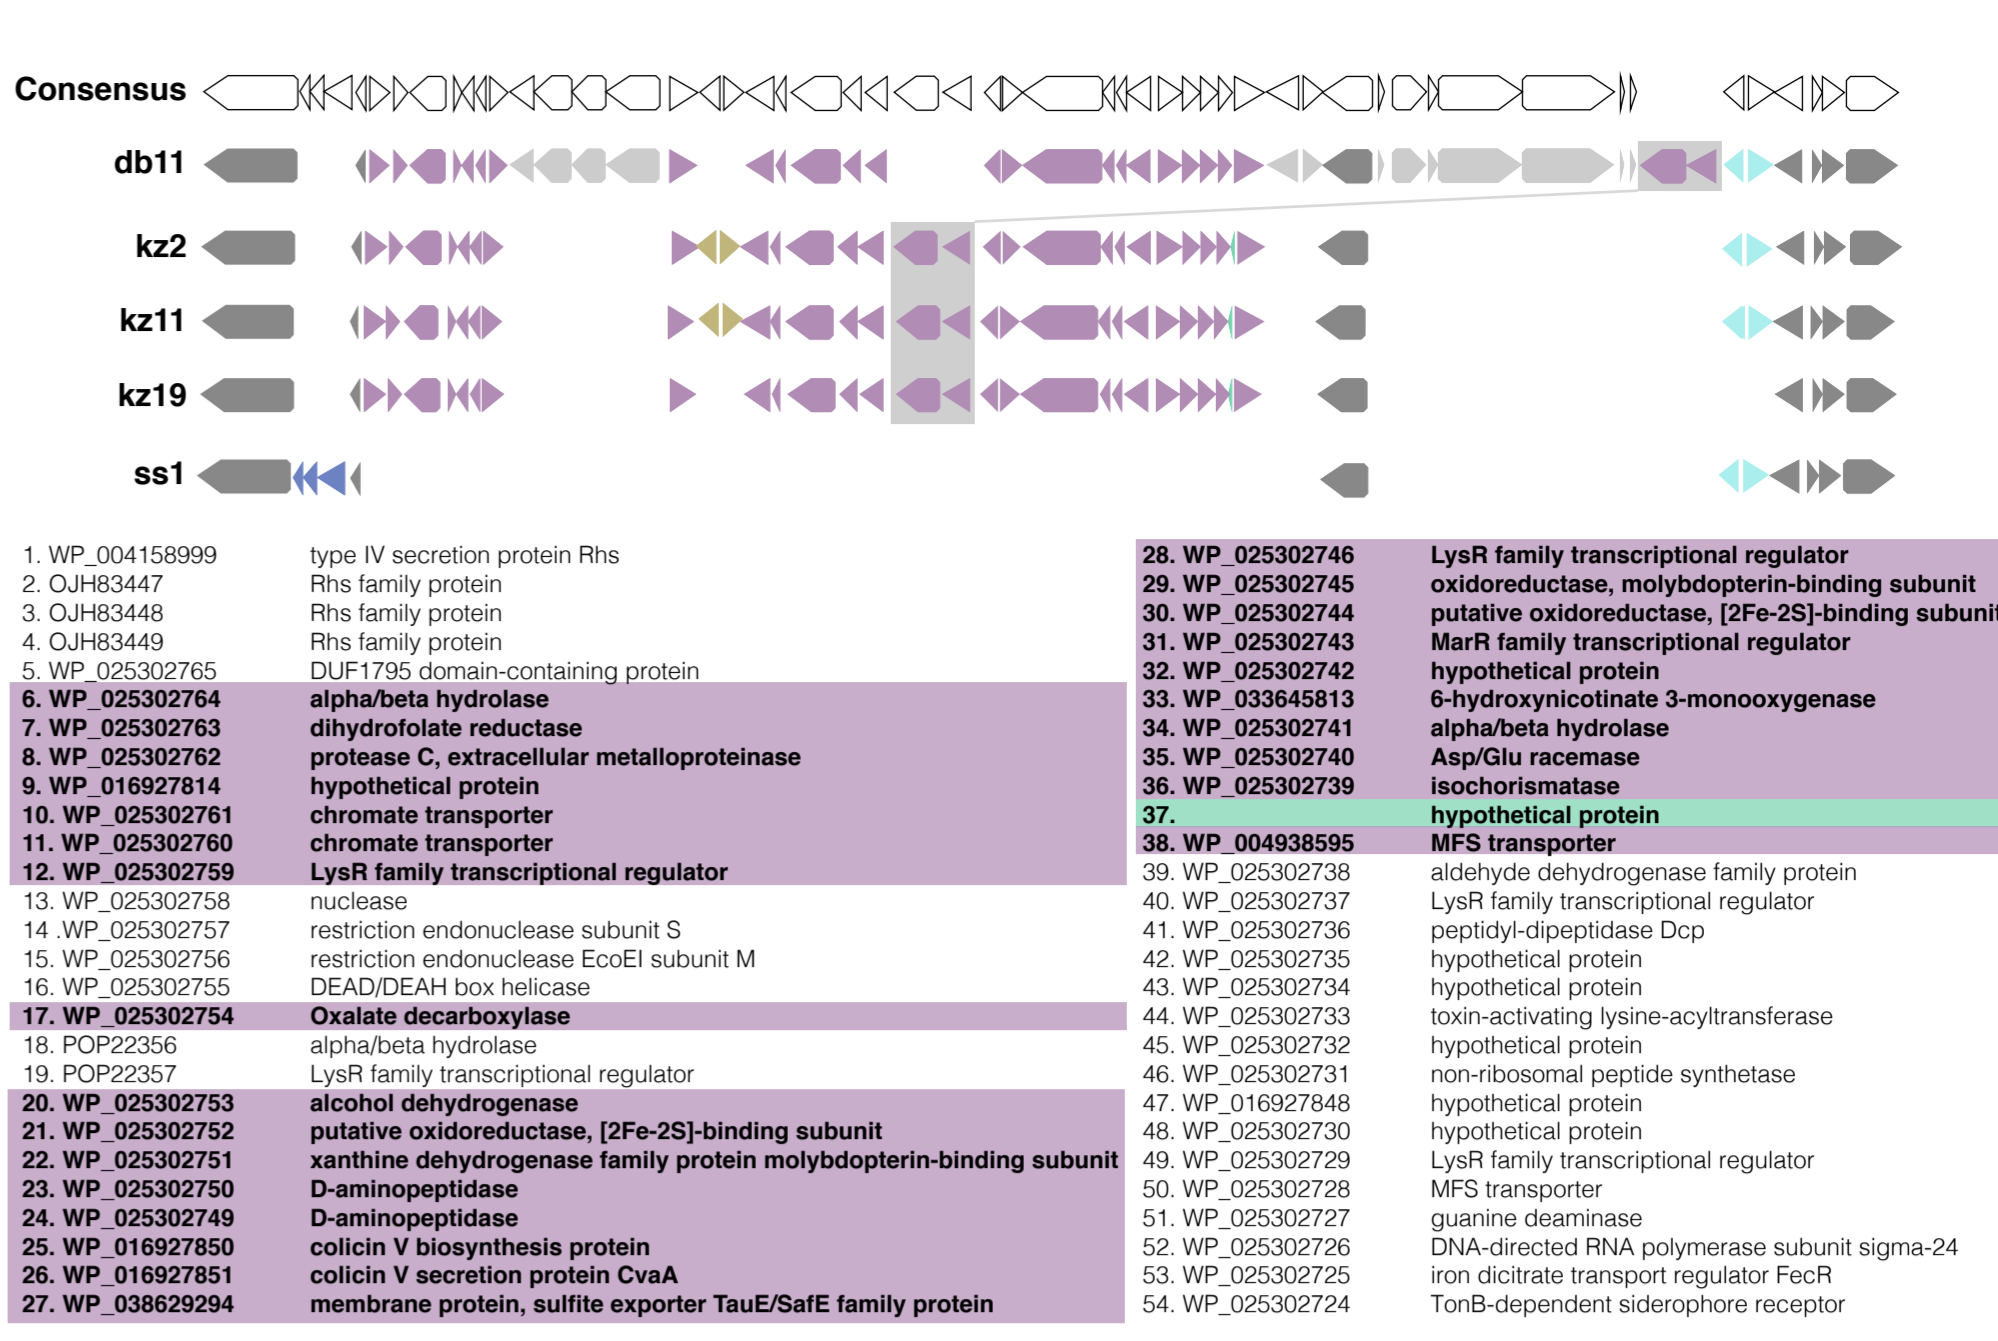

Region 5

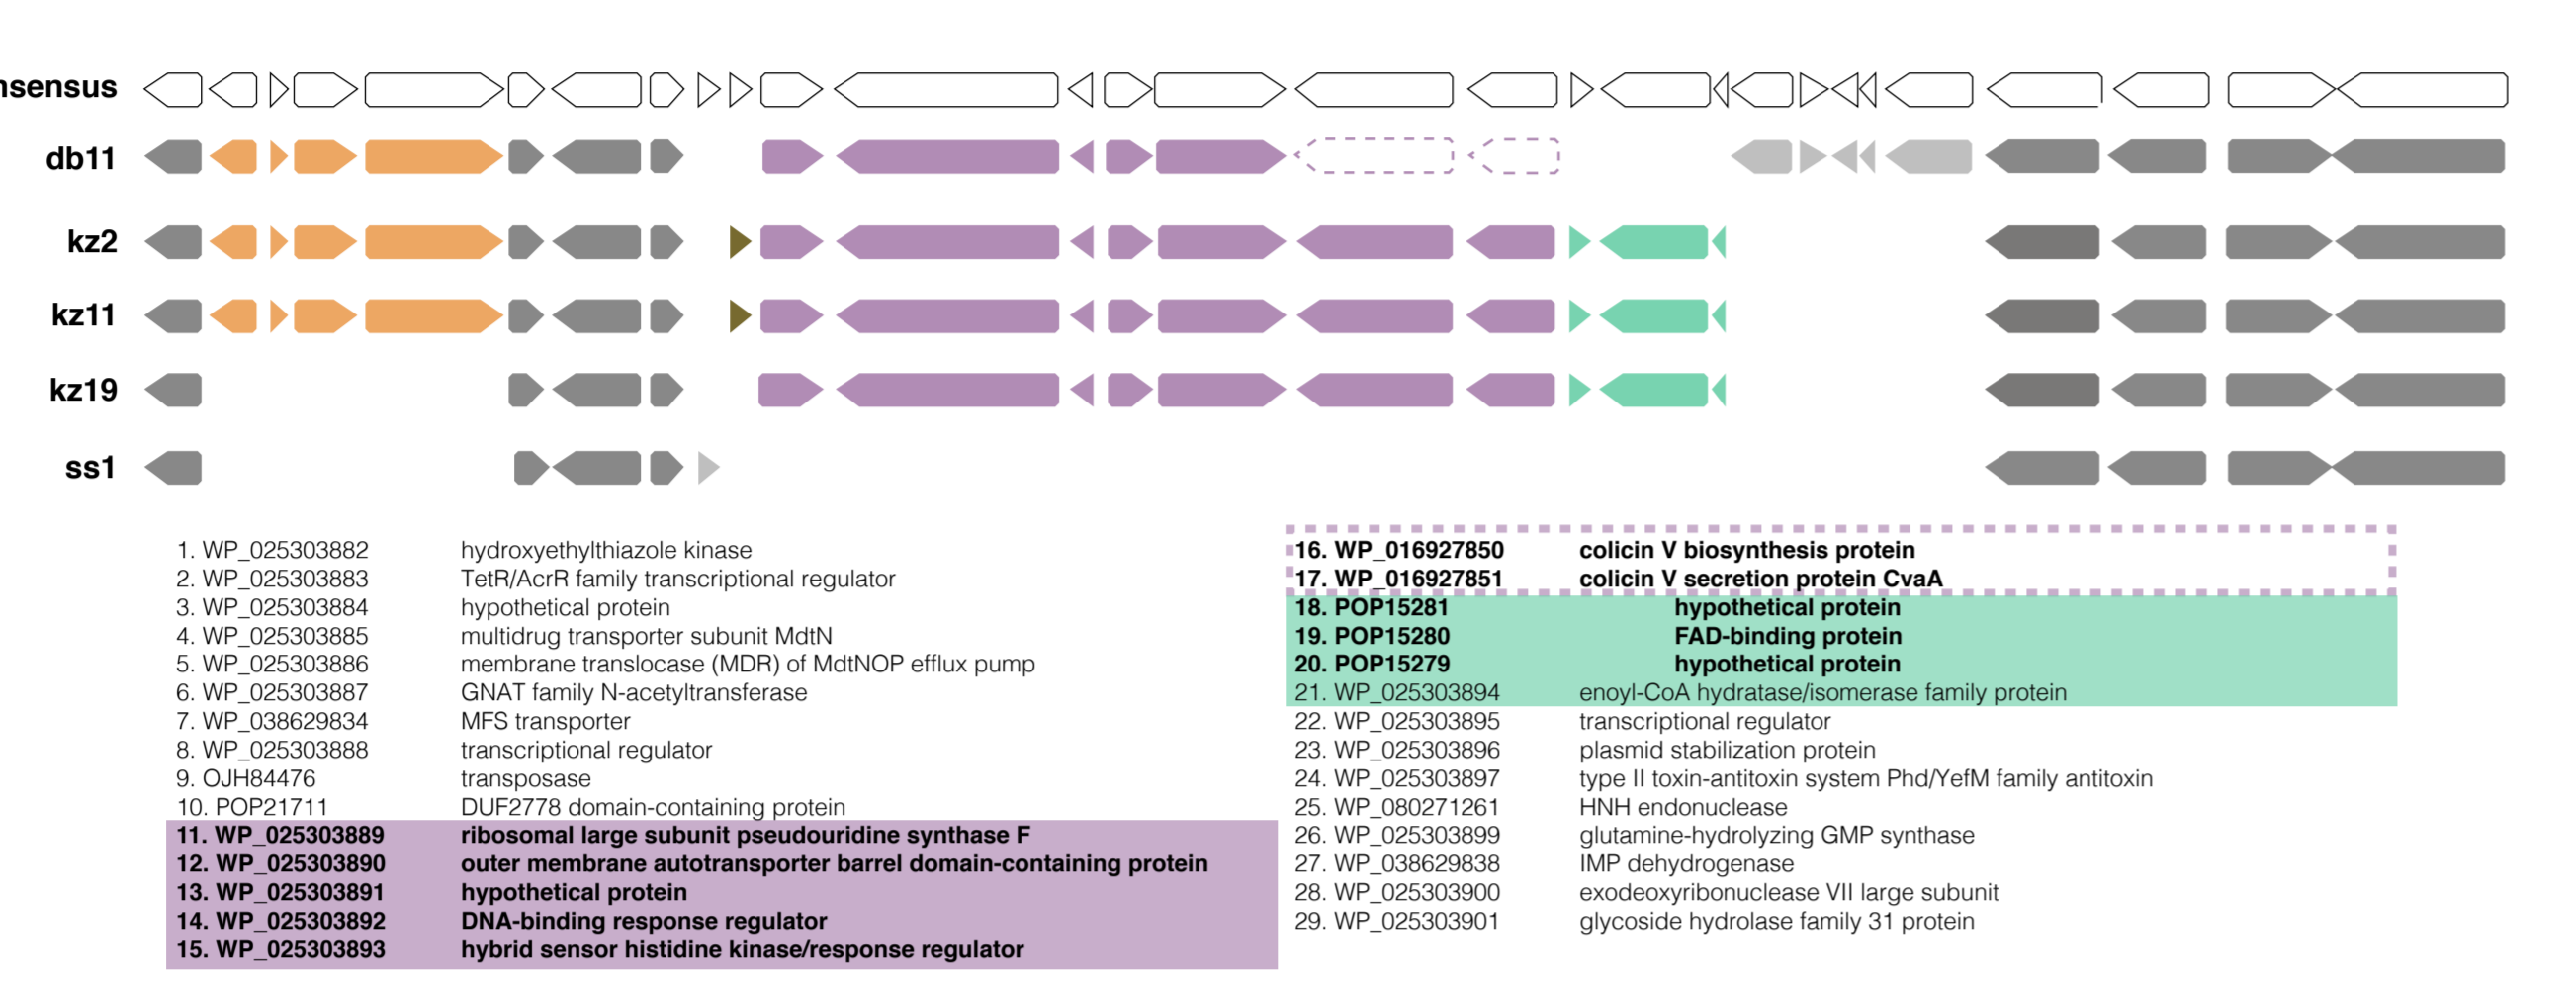

Region 11

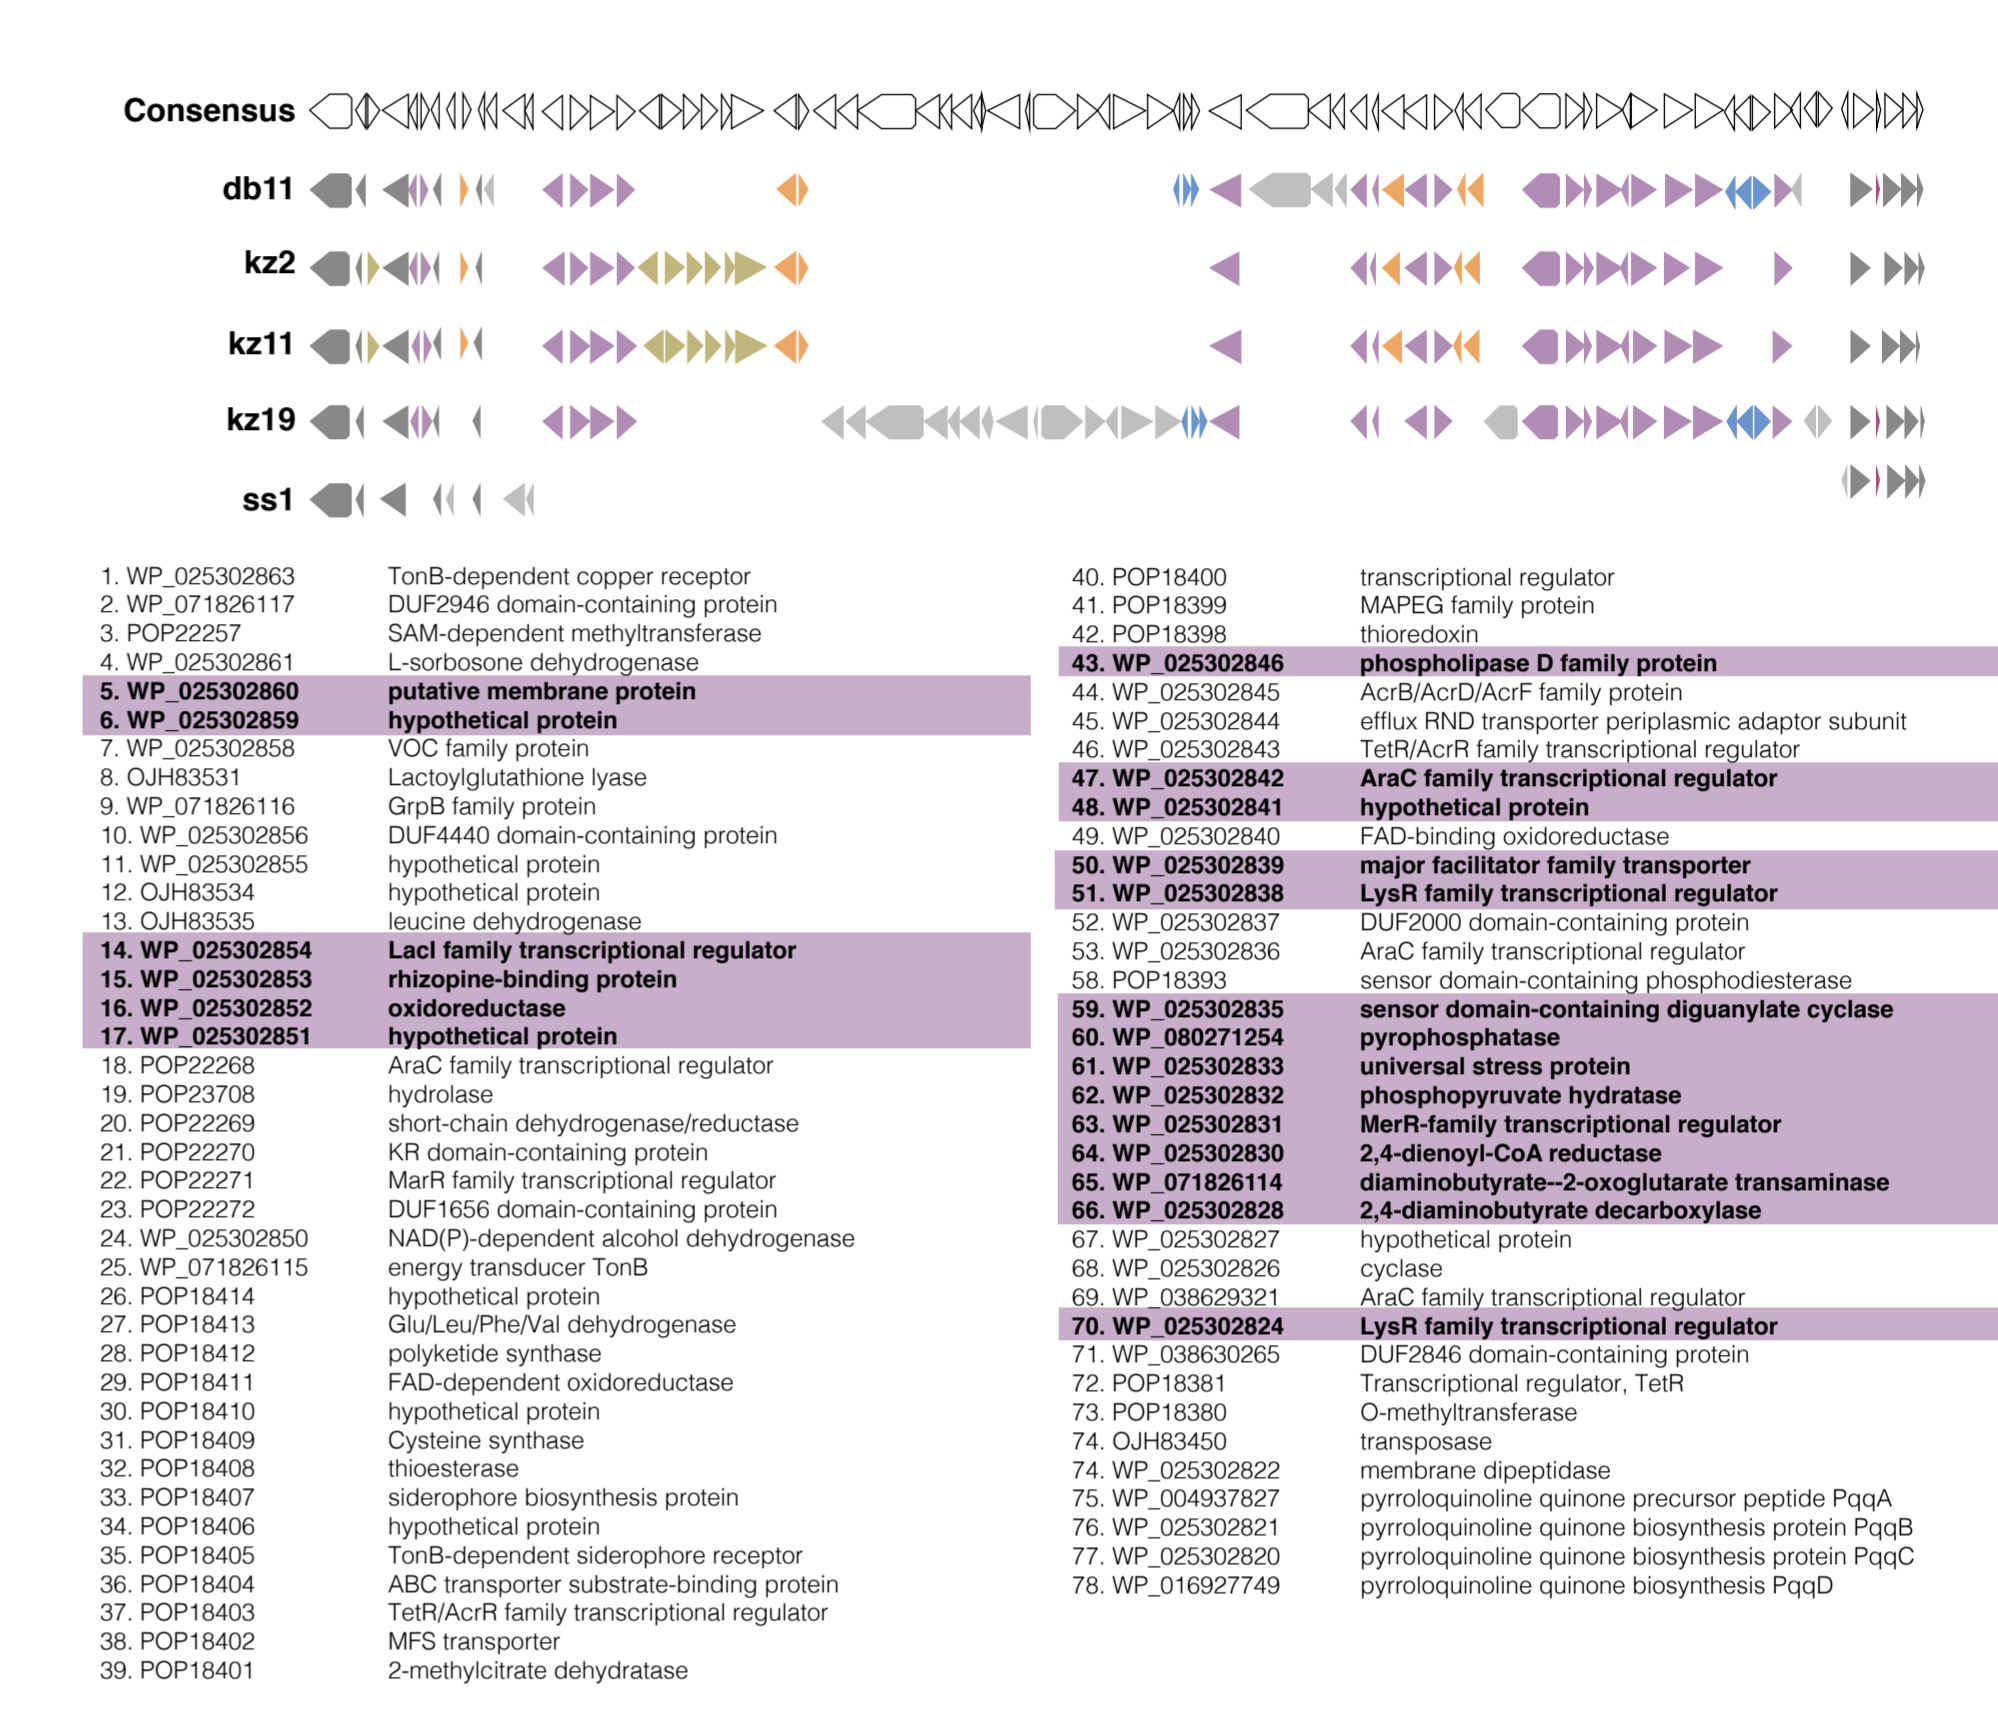

Region 6

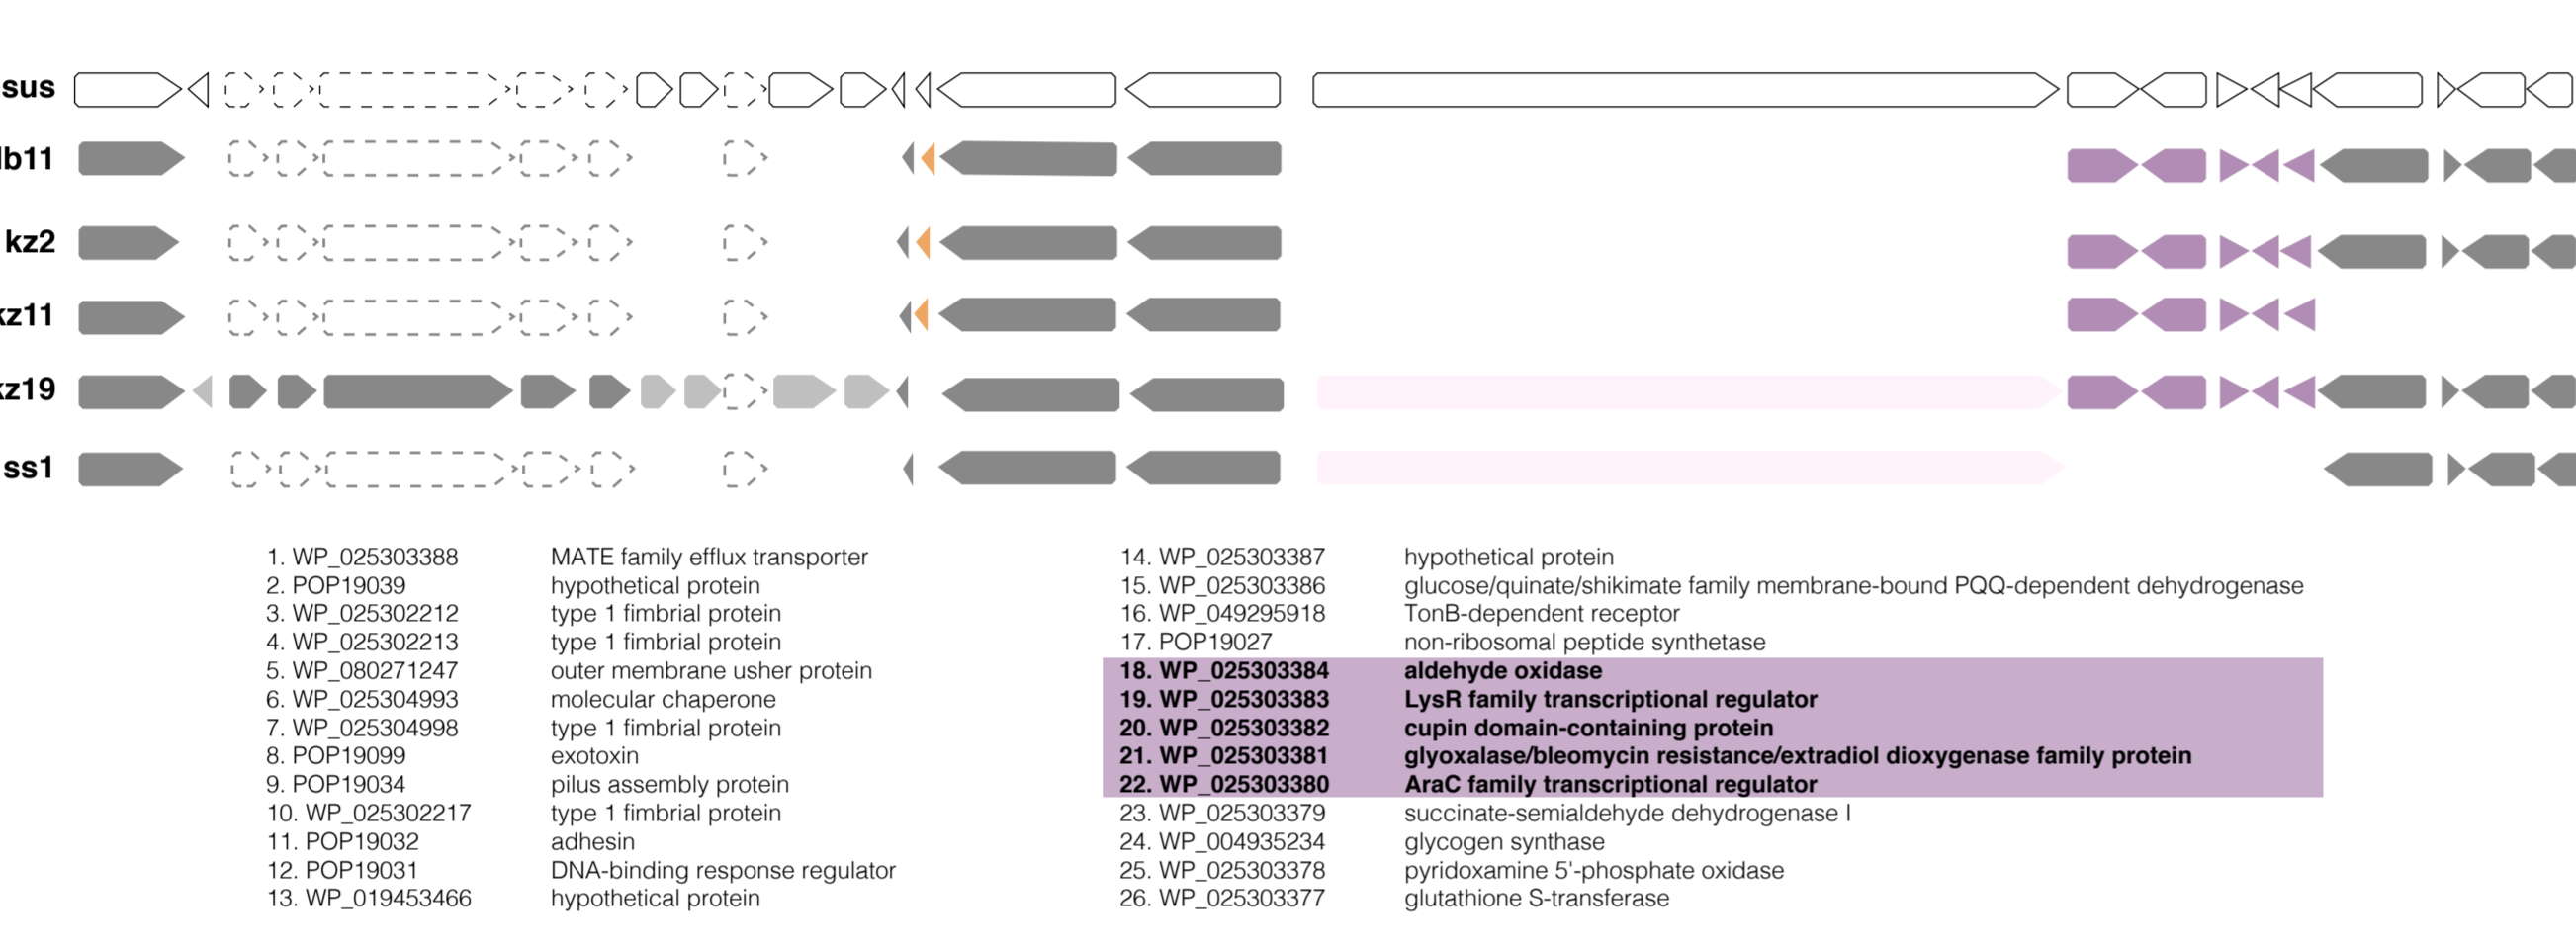

Region 12

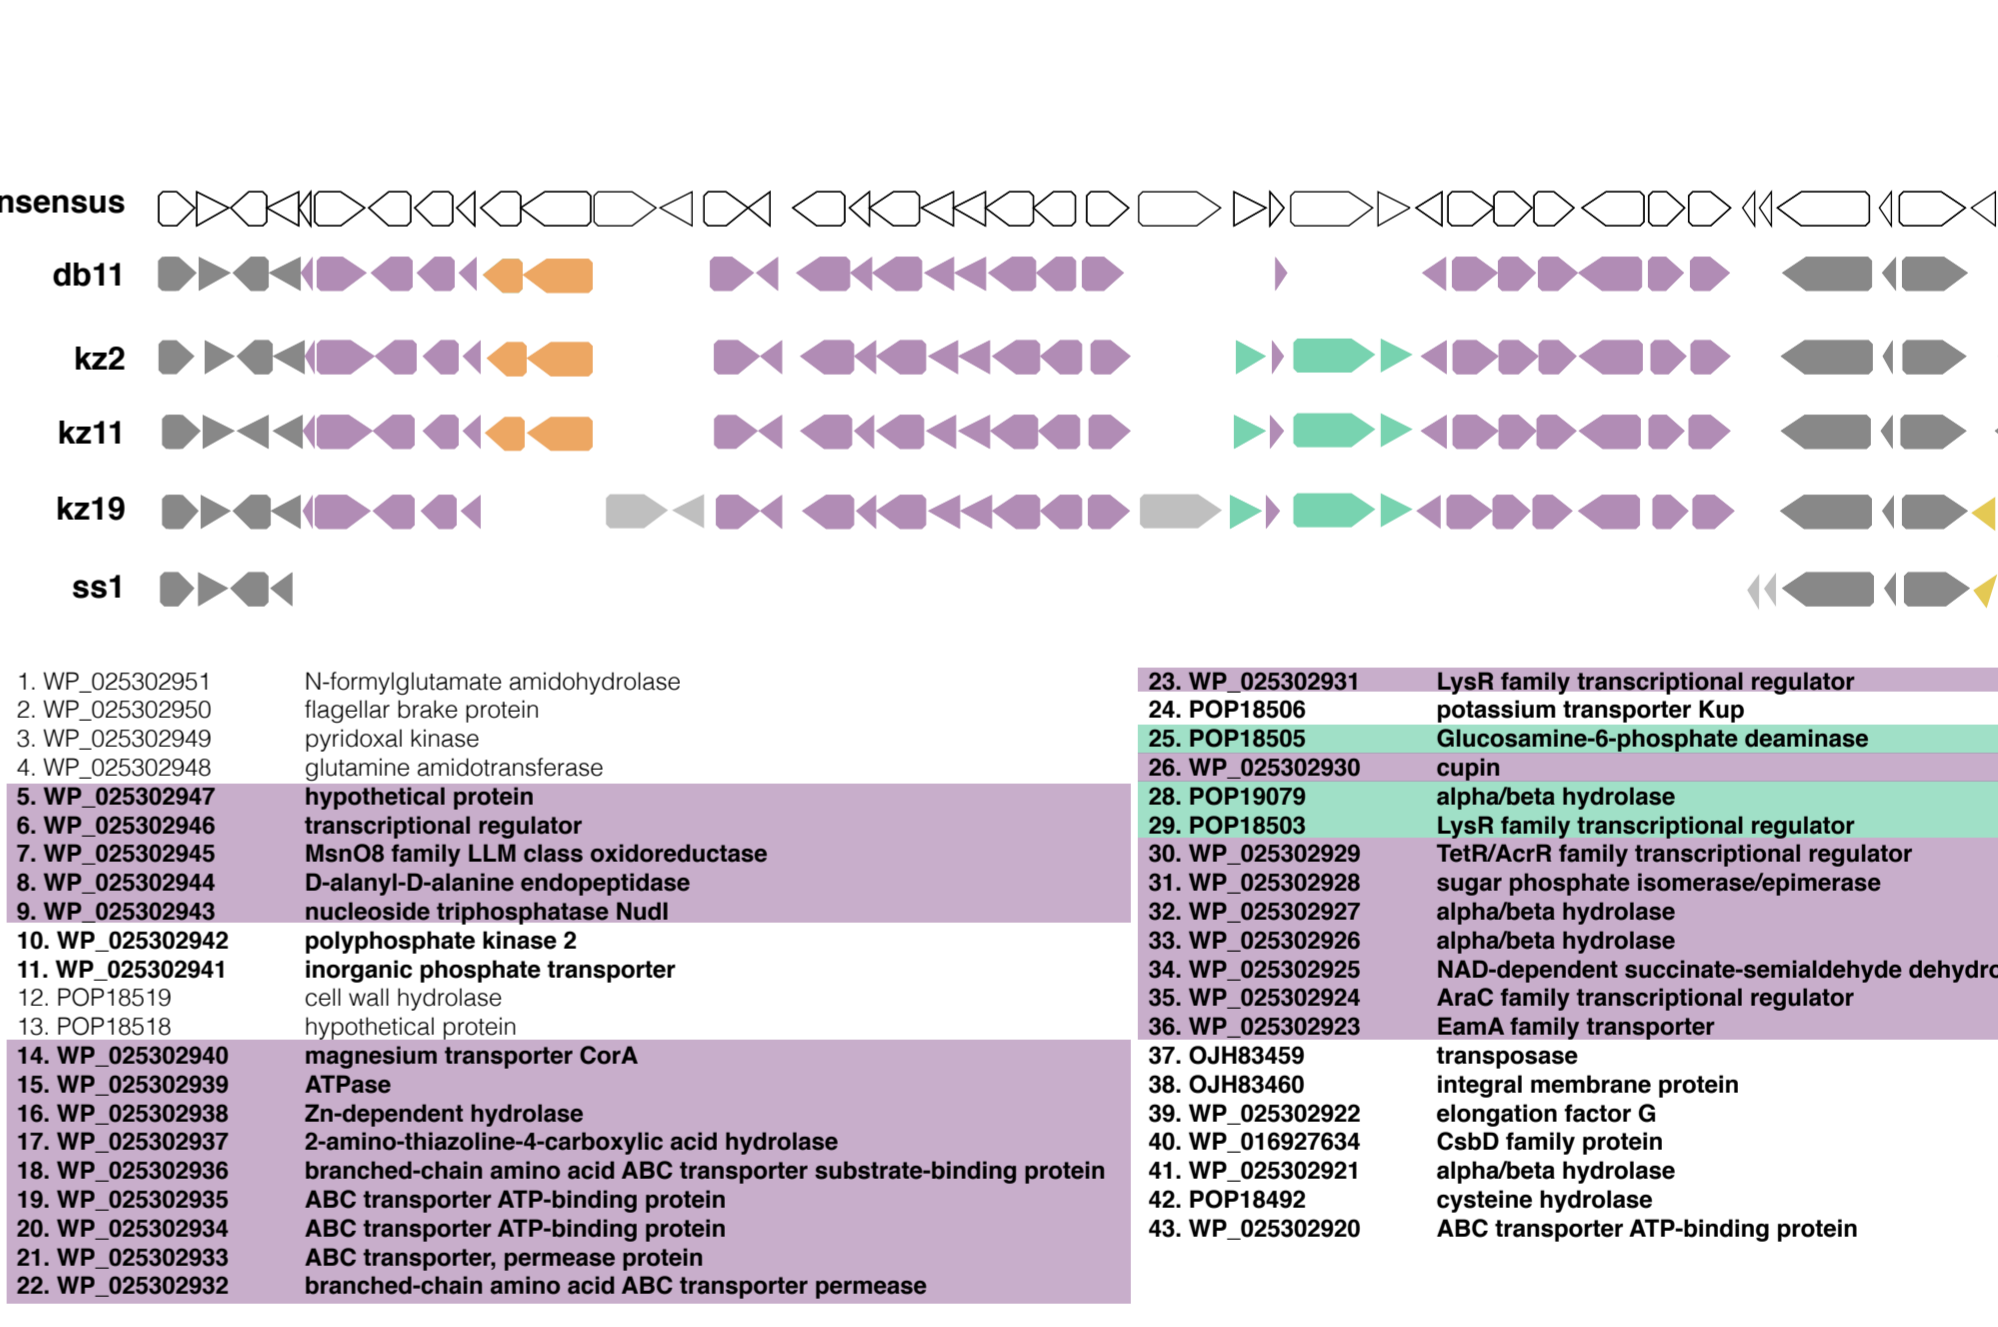

Region 7

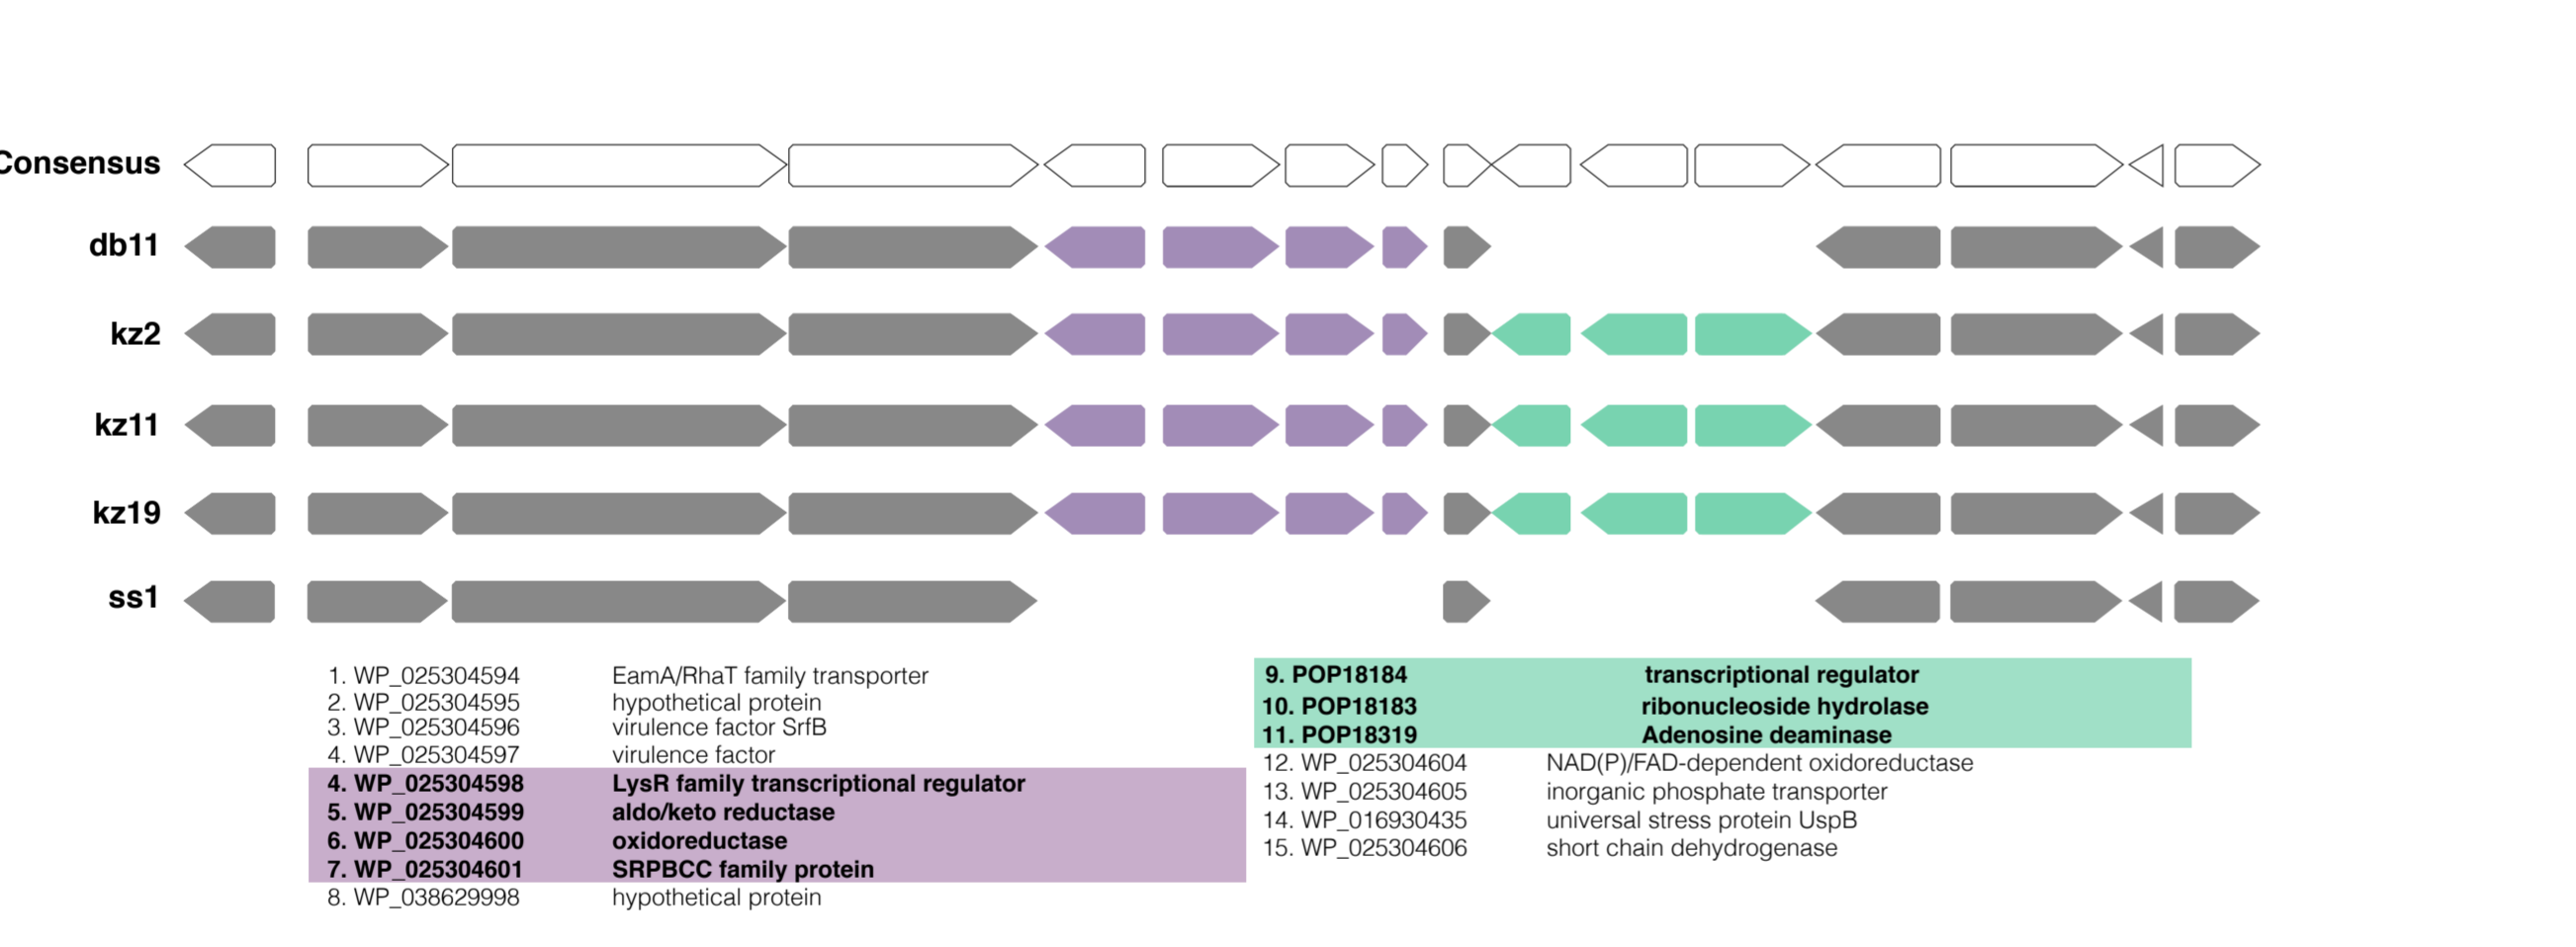

Region 13

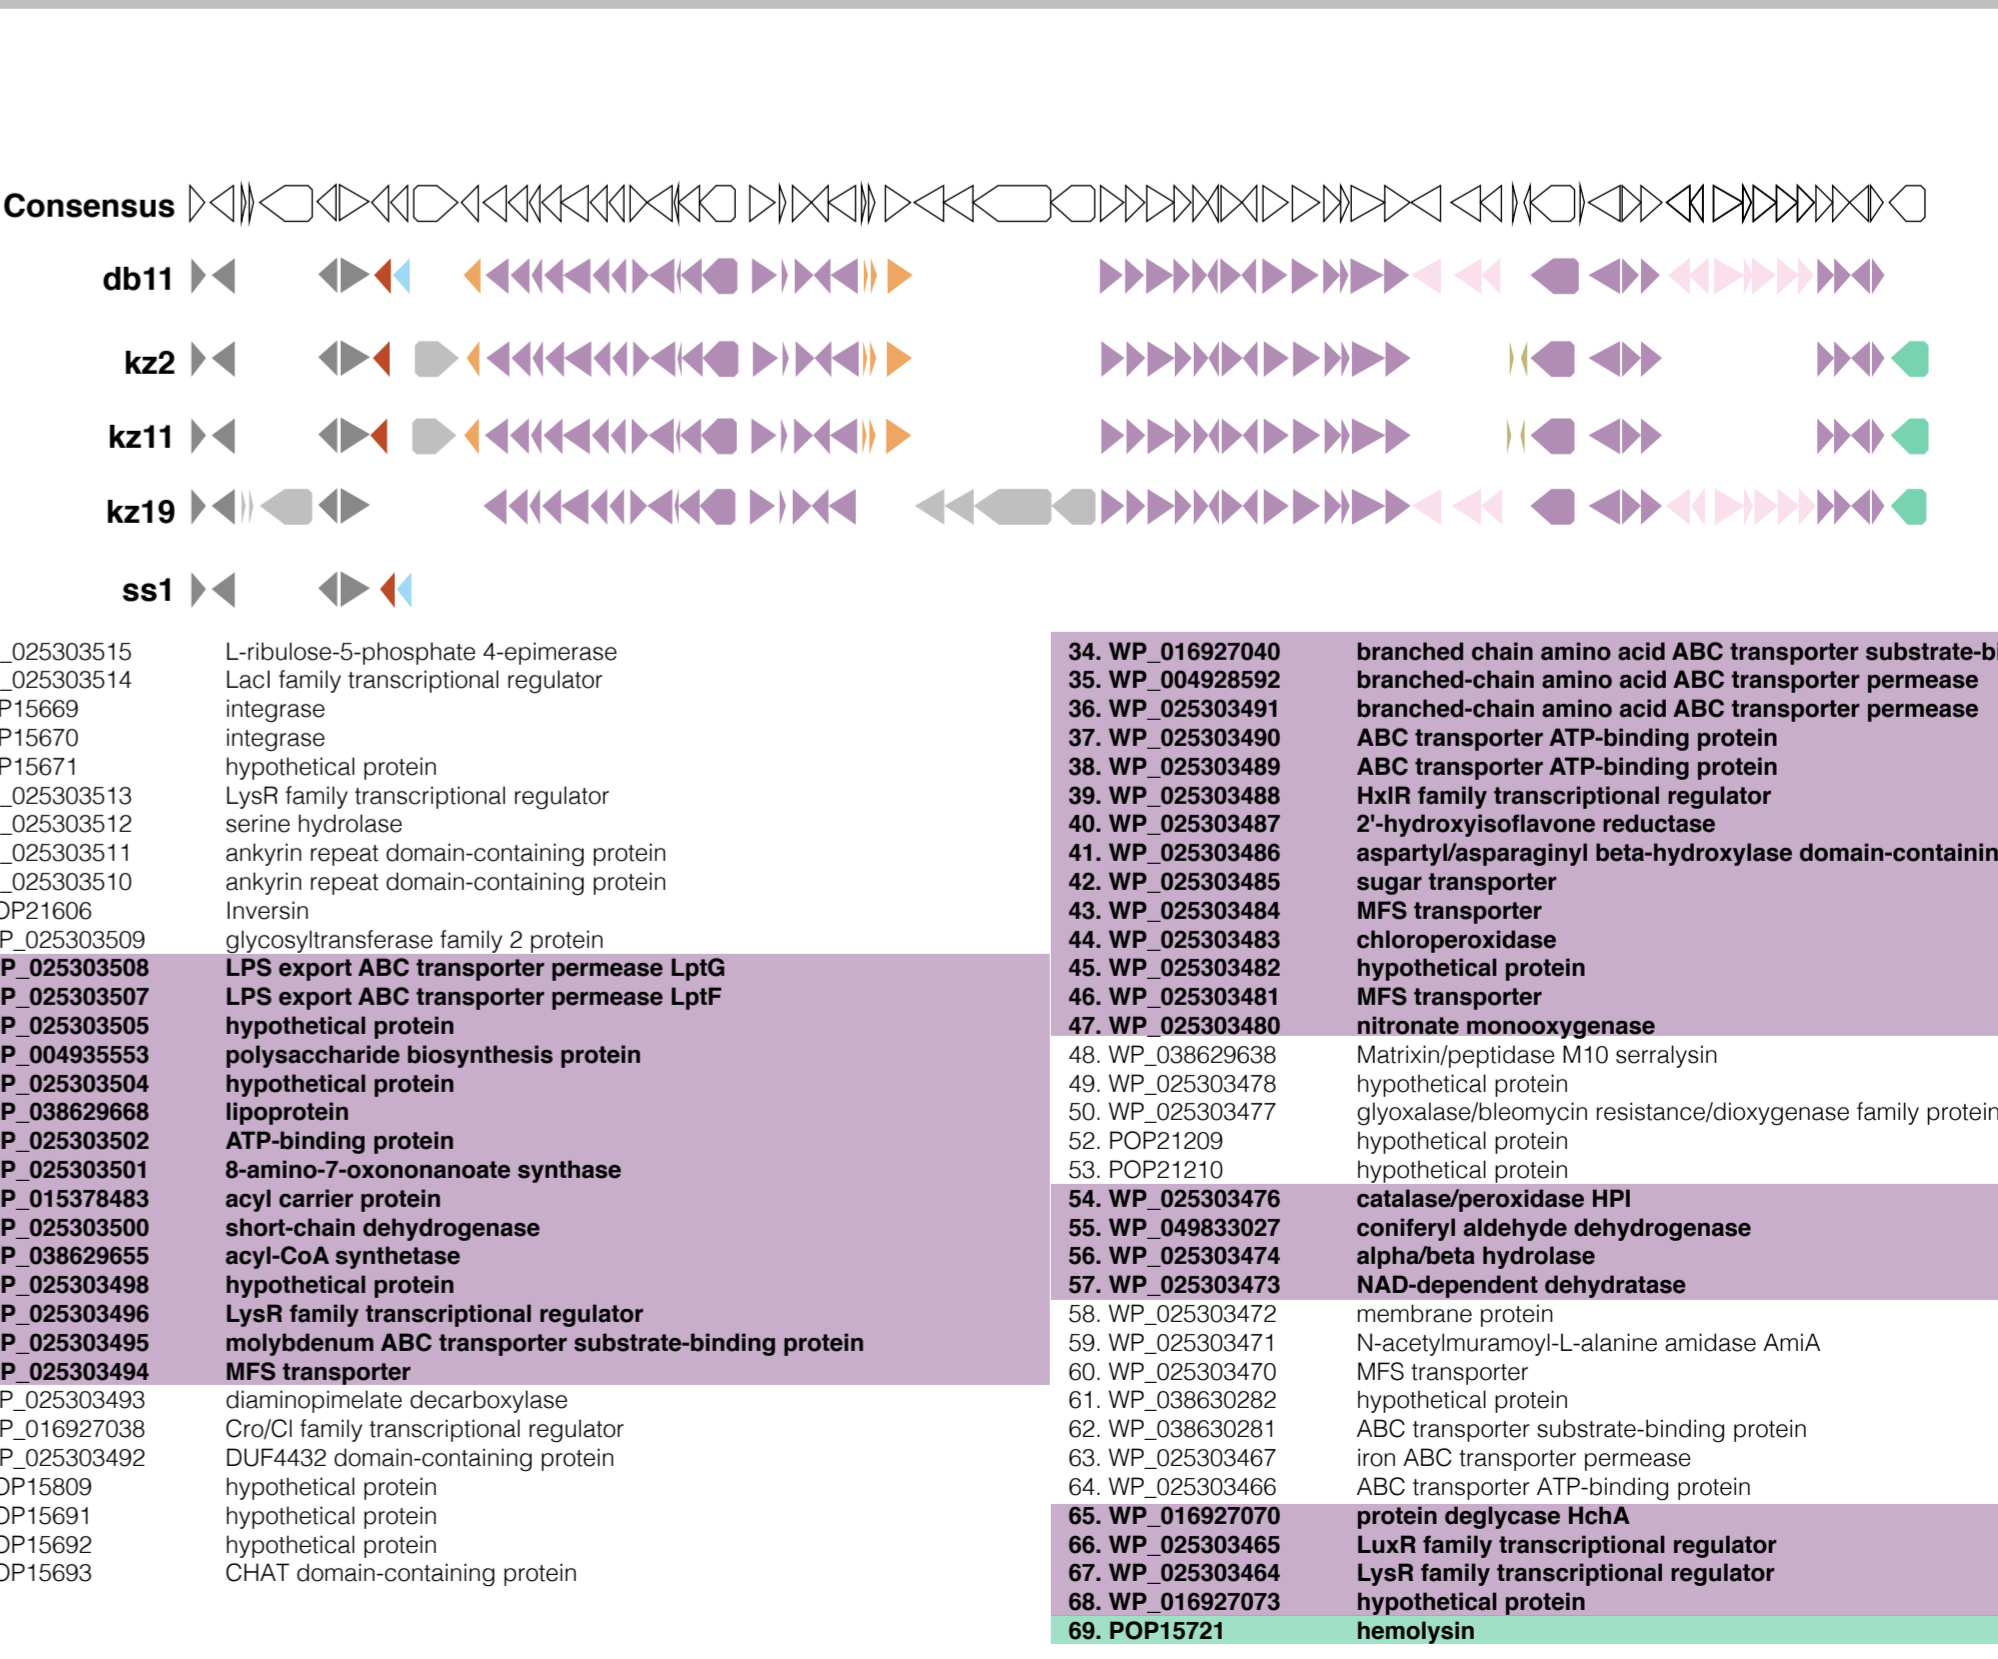

Region 8

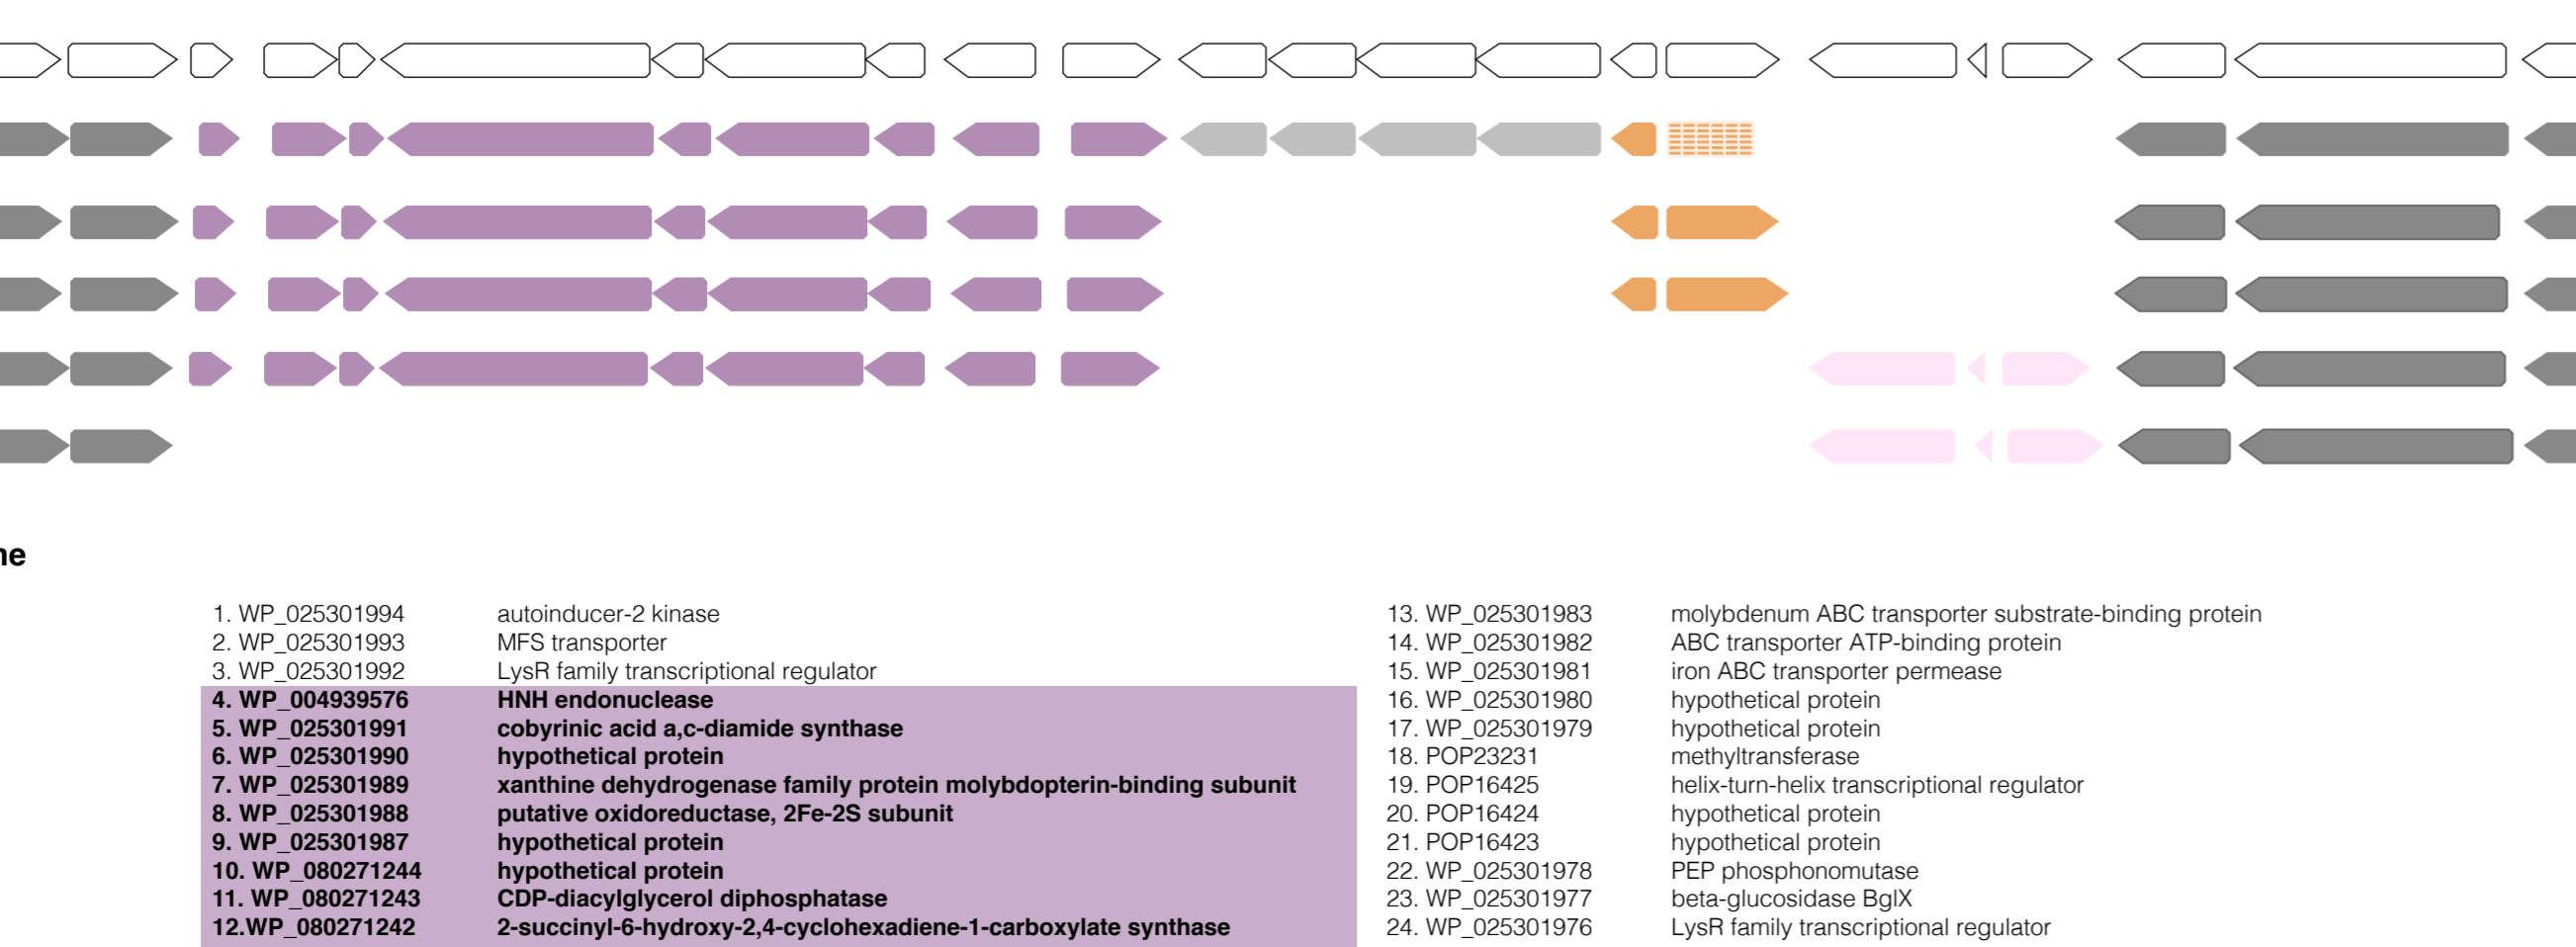

Supplement: mbo005184101sf7.pdf [file mbo005184101sf7.pdf]
