# Supplementary material for: Pathogenicity of Serratia marcescens Strains in Honey Bees
Source: PubMed Central journal article supplement (PMC6178626; doi:10.1128/mbio.01649-18), 2018-10-09
Supplement: mbo005184101st1.pdf [file mbo005184101st1.pdf]

Table S1. Relative abundance of *S. marcescens* in sampled honey bee guts.

| Sample           | Percent relative abundance of <i>Serratia marcescens</i> |
|------------------|----------------------------------------------------------|
| Tennessee bee 1  | 0.00                                                     |
| Tennessee bee 2  | 0.01                                                     |
| Tennessee bee 3  | 0.04                                                     |
| Tennessee bee 4  | 0.07                                                     |
| Tennessee bee 5  | 0.23                                                     |
| Tennessee bee 6  | 0.01                                                     |
| Tennessee bee 7  | 0.00                                                     |
| Tennessee bee 8  | 0.70                                                     |
| Tennessee bee 9  | 0.01                                                     |
| Tennessee bee 10 | 0.16                                                     |
| Tennessee bee 11 | 0.09                                                     |
| Tennessee bee 12 | 0.80                                                     |
| Tennessee bee 13 | 3.19                                                     |
| Tennessee bee 14 | 0.12                                                     |
| Tennessee bee 15 | 0.57                                                     |
| Tennessee bee 16 | 1.59                                                     |
| Tennessee bee 17 | 1.85                                                     |
| Tennessee bee 18 | 1.47                                                     |
| Tennessee bee 19 | 3.29                                                     |
| Tennessee bee 20 | 3.41                                                     |
| Tennessee bee 21 | 3.93                                                     |
| Florida bee 1    | 2.46                                                     |
| Florida bee 2    | 0.03                                                     |
| Florida bee 3    | 0.75                                                     |
| Florida bee 4    | 0.30                                                     |
| Florida bee 5    | 0.39                                                     |
| Florida bee 6    | 0.06                                                     |
| Florida bee 7    | 0.01                                                     |
| Florida bee 8    | 0.01                                                     |
| Florida bee 9    | 0.33                                                     |
| Florida bee 10   | 0.01                                                     |
| Florida bee 11   | 0.47                                                     |
| Utah bee 1       | 0.00                                                     |
| Utah bee 2       | 0.00                                                     |
| Utah bee 3       | 0.00                                                     |
| Utah bee 4       | 0.00                                                     |
| Utah bee 5       | 0.03                                                     |
| Utah bee 6       | 0.01                                                     |
| Utah bee 7       | 0.00                                                     |
| Utah bee 8       | 0.00                                                     |
| Utah bee 9       | 0.00                                                     |
| Texas bee 1      | 9.32                                                     |
| Texas bee 2      | 1.80                                                     |
| Texas bee 3      | 0.62                                                     |
| Texas bee 4      | 0.42                                                     |
| Texas bee 5      | 0.24                                                     |
| Texas bee 6      | 0.18                                                     |
| Texas bee 7      | 0.10                                                     |
| Texas bee 8      | 0.08                                                     |
| Texas bee 9      | 0.04                                                     |
| Texas bee 10     | 0.04                                                     |
| Texas bee 11     | 0.02                                                     |
| Texas bee 12     | 0.02                                                     |
| Texas bee 13     | 0.00                                                     |
| Texas bee 14     | 0.00                                                     |
| Texas bee 15     | 0.00                                                     |
| Texas bee 16     | 0.00                                                     |
| Texas bee 17     | 0.00                                                     |
| Texas bee 18     | 0.00                                                     |
| Texas bee 19     | 0.00                                                     |
| Texas bee 20     | 0.00                                                     |
| Texas bee 21     | 0.00                                                     |
| Texas bee 22     | 0.00                                                     |
| Texas bee 23     | 0.00                                                     |
| Texas bee 24     | 0.00                                                     |
| Texas bee 25     | 0.00                                                     |
| Texas bee 26     | 0.00                                                     |
