# Supplementary material for: Pathogenicity of Serratia marcescens Strains in Honey Bees
Source: PubMed Central journal article supplement (PMC6178626; doi:10.1128/mbio.01649-18), 2018-10-09
Supplement: mbo005184101st2.pdf [file mbo005184101st2.pdf]

Table S2. Genome assembly and quality data for the *S. marcescens* strains sequenced in this study.

|      | Contigs | Avg contig len | Min contig len | Max contig len | Min coverage | Max coverage | Genome size | CDS  | % GC | ANI to db11 |
|------|---------|----------------|----------------|----------------|--------------|--------------|-------------|------|------|-------------|
| KZ2  | 20      | 240,066        | 1220           | 2,786,944      | 81           | 3,610        | 5,035,724   | 4689 | 59.8 | 95.08       |
| KZ11 | 21      | 186,739        | 1221           | 1,990,358      | 134          | 4,000        | 5,036,791   | 4691 | 59.8 | 95.08       |
| KZ19 | 24      | 209,266        | 1221           | 842,184        | 52           | 1,532        | 5,226,072   | 4844 | 59.5 | 95.02       |
